# Supplementary material for: Fungal Isocyanide Synthases and Xanthocillin Biosynthesis in Aspergillus fumigatus
Source: PubMed Central journal article supplement (PMC5974471; doi:10.1128/mbio.00785-18), 2018-05-29

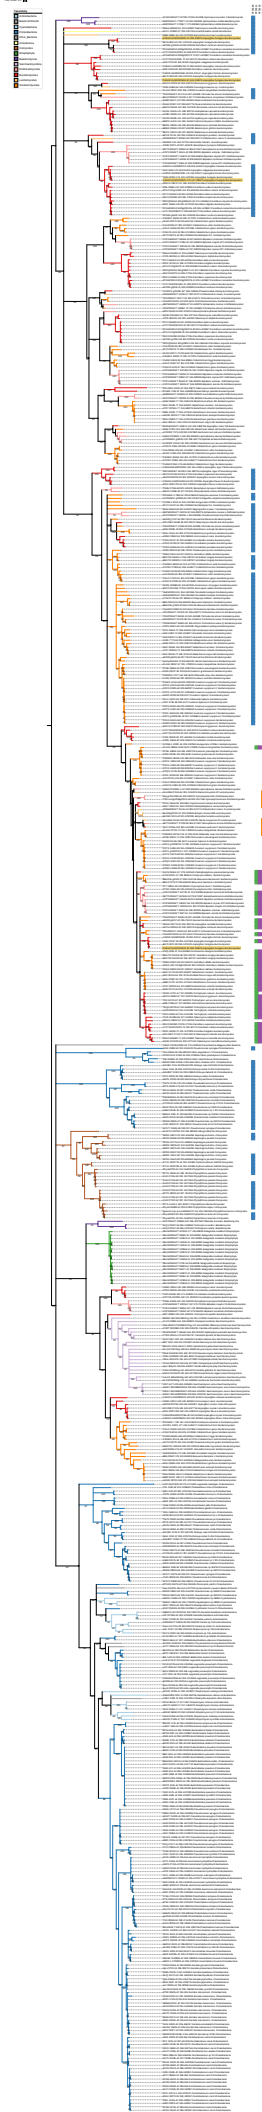

Supplement: mbo003183905sf3.pdf [file mbo003183905sf3.pdf]
