# Supplementary material for: Fungal Isocyanide Synthases and Xanthocillin Biosynthesis in Aspergillus fumigatus
Source: PubMed Central journal article supplement (PMC5974471; doi:10.1128/mbio.00785-18), 2018-05-29

- Taxonomy**
- Actinobacteria
  - Proteobacteria
  - Amoebozoa
  - Opisthokonta
  - Basidiomycota
  - Dithiostemycetes
  - Eurotiomycetes
  - Leotiomycetes
  - Sordariomycetes

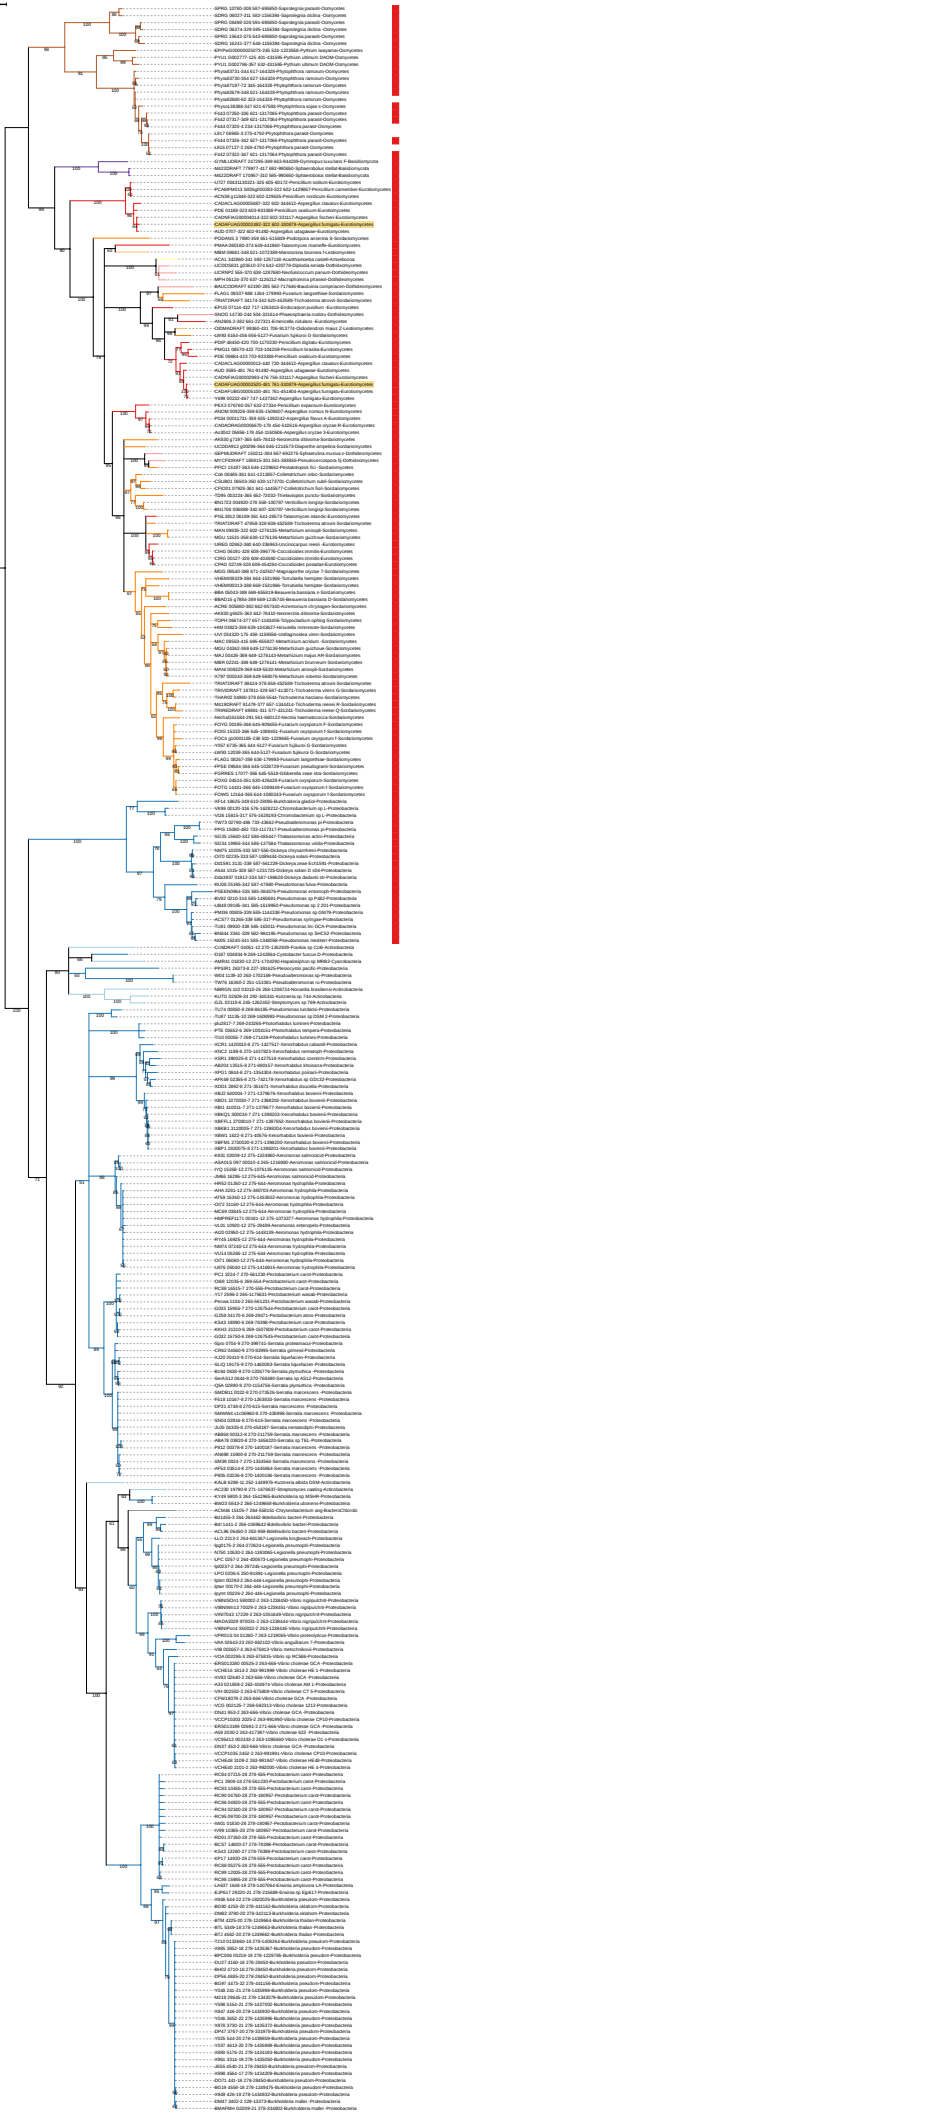

Supplement: mbo003183905sf4.pdf [file mbo003183905sf4.pdf]
